# Supplementary material for: Unravelling the Metabolic and Hormonal Machinery During Key Steps of Somatic Embryogenesis: A Case Study in Coffee
Source: Int J Mol Sci. 2019 Sep 20;20(19):4665. doi: 10.3390/ijms20194665 (PMC6802359; doi:10.3390/ijms20194665)
Supplement: Supplementary file 1 [file ijms-20-04665-s001.pdf]

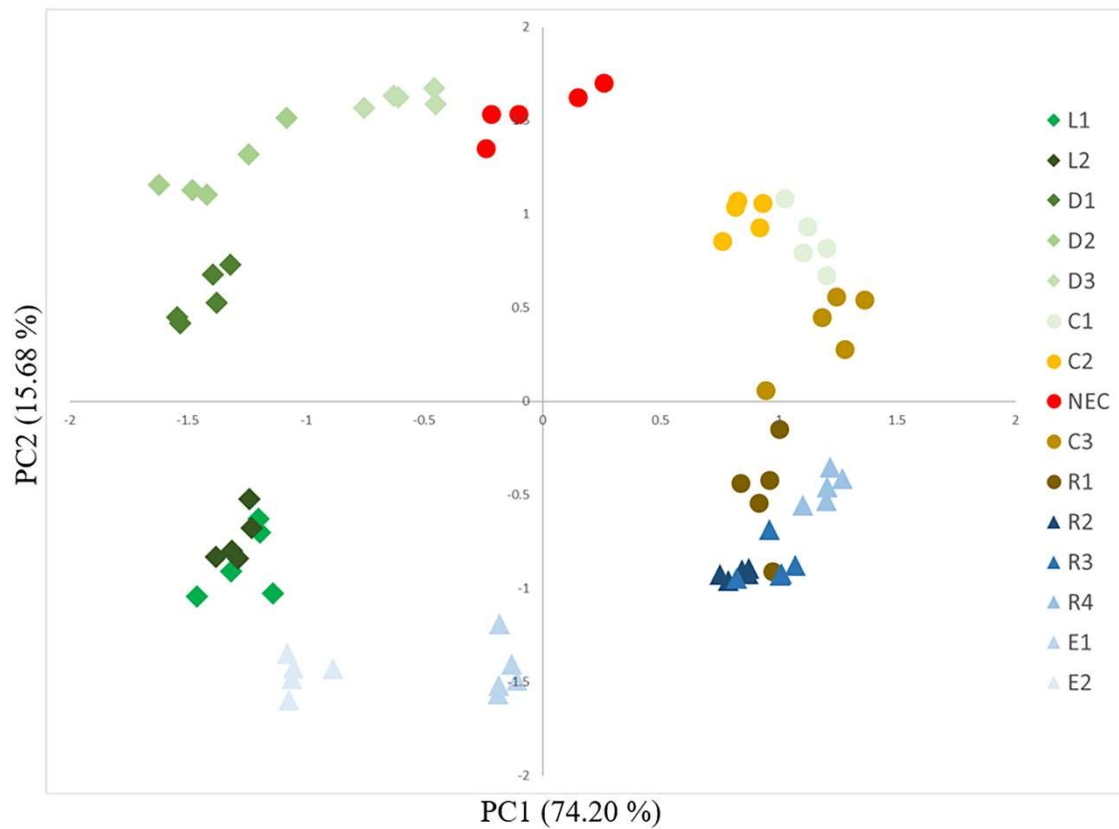

**Figure S1.** Assessment of homogeneity of metabolic replicates in 15 key sampled stages of the somatic embryogenesis process. A Principal Component Analysis (PCA) was carried out to verify homogeneity of 5 independent replicates; i.e. 5 independent leaf introductions in February, April, June, October and December 2016. Samples correspond to : Leaves from greenhouse plants (L1), explants during dedifferentiation [0 h (L2), 1 week (D1), 2 weeks (D2), 5 weeks (D3)], compact primary callus obtained 3 months after induction (C1), embryogenic callus obtained 7 months after induction (C2), established cell clusters obtained after 4 months in proliferation medium (C3), early regeneration of embryos from cell clusters [1 week in DIF medium without reducing cell density (R1), 24 h in DIF medium after reducing cell density (R2), 72 h (R3), 10 d (R4)], globular embryos (E1) and torpedo-shaped embryos (E2). Non-embryogenic callus (NEC) was also sampled at the same time as the embryogenic callus (C2).

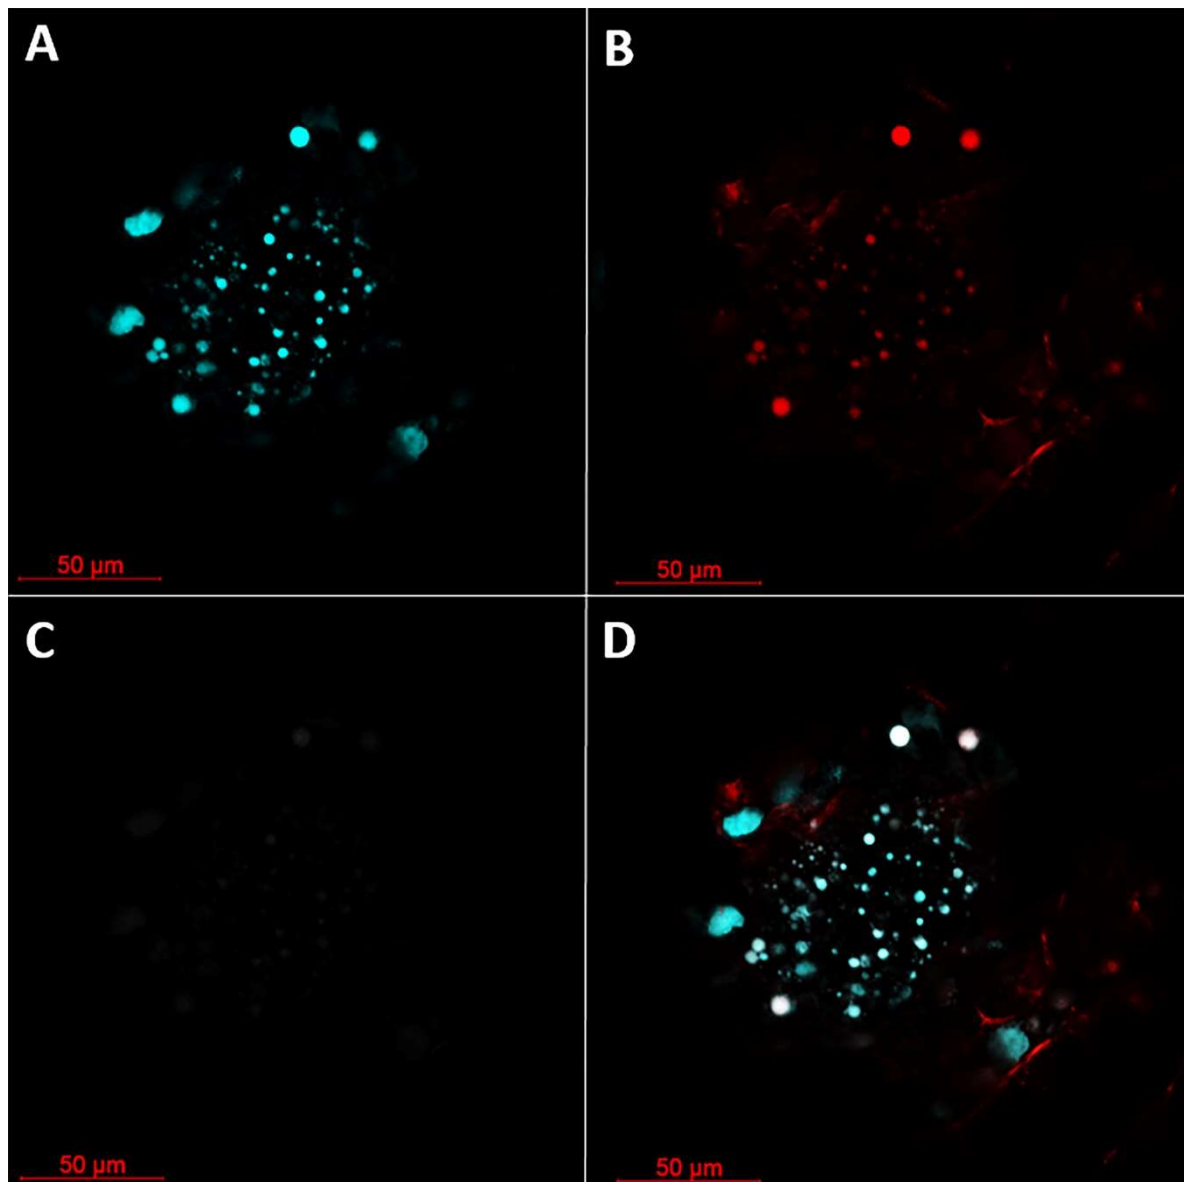

**Figure S2.** Validation of the presence of total chlorogenic acids in Arabica globular-shaped embryos by multiphoton microscopy combined with emission spectral analysis. After obtaining the spectral acquisitions, the LinearUnmixing function (Zen software) was executed to separate, pixel by pixel, the mixed signals of defined pure autofluorescent compounds (chlorogenic acids (A) and chlorophyll (B)), using the entire emission spectrum of each compound, plus a residual channel (C). An overlay image of the three channels was finally generated (D).

**Table S1.** List of primary and secondary metabolites detected over the 15 sampled stages of the Arabica somatic embryogenesis process.

| Metabolite classification | Metabolites detected                                                                                                                                                                                                                                                                                                                                                                                                                                                                                                                                                                                                                                                                                                                                                                                                                                                                                                                                    |
|---------------------------|---------------------------------------------------------------------------------------------------------------------------------------------------------------------------------------------------------------------------------------------------------------------------------------------------------------------------------------------------------------------------------------------------------------------------------------------------------------------------------------------------------------------------------------------------------------------------------------------------------------------------------------------------------------------------------------------------------------------------------------------------------------------------------------------------------------------------------------------------------------------------------------------------------------------------------------------------------|
| Primary metabolites       | 2-Imidazolidone-4-carboxylic acid<br>Aconitic acid, cis-<br>Adenosine-5-monophosphate/Guanosine-5-monophosphate<br>Alanine<br>Alanine, beta-<br>Arabinonic acid<br>Arabinose<br>Asparagine<br>Aspartic acid<br>Benzoic acid<br>Benzoic acid, 4-hydroxy-<br>Benzylalcohol<br>Boric acid<br>Butanoic acid, 4-hydroxy-<br>Caffeic acid, trans-<br>Citric acid<br>Erythritol<br>Erythronic acid<br>Ethanolamine<br>Ethanolaminephosphate<br>Fructose<br>Fructose-1-phosphate<br>Fructose-6-phosphate<br>Fumaric acid<br>Furan-2-carboxylic acid<br>Galactaric acid<br>Galactinol<br>Galactonic acid<br>Gentiobiose<br>Gluconic acid<br>Glucose<br>Glucose-6-phosphate<br>Glutaric acid, 2-oxo-<br>Glutaric acid, 3-hydroxy-3-methyl-<br>Glyceric acid<br>Glyceric acid-3-phosphate<br>Glycerol<br>Glycerol-3-phosphate<br>Glycerophosphoglycerol<br>Glycine<br>Glycolic acid<br>Guanosine<br>Hexadecanoic acid<br>Hydroquinone<br>Inosine<br>Inositol, myo- |

Inositol-phosphate, myo-  
Isocaproic acid, 2-oxo-  
Lactic acid  
Leucine  
Lysine  
Malic acid  
Malic acid, 2-methyl-  
Malonic acid  
Maltose  
Maltotriose  
Mannitol  
Mannose-6-phosphate  
Methionine  
Nicotinic acid  
Octadecanoic acid  
Orotic acid  
Phenylalanine  
Phosphoric acid  
Phosphoric acid monomethyl ester  
Piperidine-2-carboxylic acid  
Proline  
Proline, 4-hydroxy-, cis-  
Propanoic acid, 2-amino-2-methyl-3-hydroxy-  
Purine, 6-benzylamino-, 9-beta-D-glucopyranosyl-  
Putrescine  
Pyroglutamic acid + Glutamic acid + Glutamine  
Quinic acid  
Raffinose  
Ribitol  
Ribonic acid  
Ribose  
Saccharic acid  
Salicylic acid  
Shikimic acid  
Sorbitol  
Starch  
Succinic acid  
Sucrose  
Thiazole, 4-methyl-5-hydroxyethyl-  
Threonic acid  
Trigonelline  
Tryptophan  
Uridine  
Valine  
Xanthosine  
Xylose

#### **Secondary metabolites**

3-Caffeoylquinic acid  
3,4-diCaffeoylquinic acid

3,5-diCaffeoylquinic acid  
4-Caffeoylquinic acid  
4,5-diCaffeoylquinic acid  
5-Caffeoylquinic acid  
Caffeine  
Catechin  
Epicatechin  
Feruloylquinic acid  
Mangiferin  
Theobromine

---
